# Supplementary material for: Zinc binding regulates amyloid-like aggregation of GAPR-1
Source: Oxford University Press journal article supplement (doi:10.1042/bsr20182345), 2019-01-30

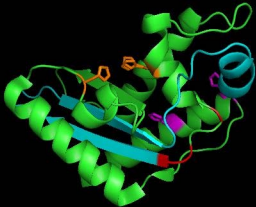

Supplement: bsr-2018-2345_supp.pdf [file bsr-2018-2345_supp.pdf]
